# Supplementary material for: High Partial Auxeticity Induced by Nanochannels in [111]-Direction in a Simple Model with Yukawa Interactions
Source: MDPI journal article supplement (doi:10.3390/ma11122550), 2018-12-14
Supplement: s1 [file s1]

Article

# Supplementary Information for “High partial auxeticity in simple model with Yukawa interactions induced by nanochannels in [111]-direction”

Konstantin V. Tretiakov<sup>1</sup>, Paweł M. Pięłowski<sup>1</sup>, Jakub W. Narojczyk<sup>1</sup>, Mikołaj Bilski<sup>2</sup> and Krzysztof W. Wojciechowski<sup>1</sup>

<sup>1</sup> Institute of Molecular Physics, Polish Academy of Sciences, M. Smoluchowskiego 17, 60-179 Poznań, Poland

<sup>2</sup> Institute of Applied Mechanics, Poznań University of Technology, Jana Pawła II 24, 60-965 Poznań, Poland

\* tretiakov@ifmpan.poznan.pl, Tel.: +48-61-689-52-76; mikolaj.bilski@put.poznan.pl

Published: date

## 1. Used nomenclature

The signs used in the manuscript are shown below

- $N$  – the number of particles
- $N_{HS}$  – the number of particles forming inclusion
- $N_Y$  – the number of ‘Yukawa’ particles
- $n$  – the number of fcc cells on the edge of the system
- $c$  – the concentration of the nanoinclusion particles
- $\sigma$  – the particles’ diameter
- $\kappa^{-1}$  – the Debye’s screening length
- $\epsilon$  – the contact potential
- $\beta = 1/(k_B T)$
- $k_B$  – the Boltzmann constant
- $T$  – the temperature
- $r_{ij}$  – distance between  $i$ -th and  $j$ -th particle
- $S_{ijkl}$  – component of elastic compliance tensor
- $\epsilon_{ij}$  – component of strain tensor
- $V_p$  – equilibrium volume of the system
- $P$  – pressure
- $p^* \equiv \beta P \sigma^3$  – reduced pressure
- $\mathbf{h}$  – the box matrix
- $\mathbf{h}_0 \equiv \langle \mathbf{h} \rangle$  – the reference box matrix
- $I$  – identity matrix
- $\delta_{ij}$  – the Kronecker delta
- $n_i$  – the  $i$ -component of a unit vector in the direction of the applied stress
- $m_i$  – the  $i$ -component of a unit vector in the direction in which the reaction of the system is observed.
- $\nu_{nm}$  – the Poisson’s ratio
- $\chi$  – the degree of auxeticity

In this paper Voigt’s notation and Einstein’s summation are used.

## 2. Computations of the elastic compliances

The Lagrangian strain tensor can be expressed as [1]:

$$\varepsilon_{ij} \equiv \left( \partial_i u_j + \partial_j u_i + \sum_k \partial_i u_k \partial_j u_k \right) / 2, \quad (1)$$

where  $u_i \equiv x_i - X_i$  is the displacement vector and  $X_i, x_i$  describe respectively the undeformed state and the state under the deformation [1]. Under constant isotropic pressure ( $P$ ) the expansion of the change of free enthalpy (Gibbs free energy),  $\Delta G$ , caused by deformation of a crystal has the form [2]:

$$\Delta G = \frac{1}{2} V_p B_{ijkl} \varepsilon_{ij} \varepsilon_{kl} + \dots \quad (2)$$

where  $B_{ijkl}$  are the components of the elastic constants tensor at fixed temperature and pressure  $P$  (the Einstein's summations is used). Under the isotropic pressure conditions,  $\sigma_{ij} \equiv -P\delta_{ij}$ , the elastic constants  $B_{ijkl}$  form the relation between the components of the strain tensor  $\varepsilon_{kl}$  and the stress tensor  $\sigma_{ij}$  [3] (the Hooke's law):

$$\Delta\sigma_{ij} = B_{ijkl} \varepsilon_{kl}, \quad (3)$$

where  $\Delta\sigma_{ij} \equiv \sigma_{ij} + P\delta_{ij}$ . By inversion, the above reads:

$$\varepsilon_{ij} = S_{ijkl} \Delta\sigma_{kl}, \quad (4)$$

where  $S_{ijkl}$  is the elastic compliance tensor, a fourth-rank tensor which remains unchanged when replacing  $i-j, k-l$  and  $ij-kl$ . The elastic compliances are related to the elastic constants tensor elements by the following equality [4]:

$$S_{iklm} B_{lmnp} = \frac{1}{2} (\delta_{ip} \delta_{kq} + \delta_{iq} \delta_{kp}). \quad (5)$$

In computer simulations the strain tensor is obtained from two matrices - the  $\mathbf{h}$  matrix describing the system's state (under pressure  $P$ ) and reference box matrix [5,6]  $\mathbf{h}_0$  ( $\mathbf{h}_0 \equiv \langle \mathbf{h} \rangle$ ):

$$\boldsymbol{\varepsilon} = \frac{1}{2} (\mathbf{h}_0^{-1} \cdot \mathbf{h} \cdot \mathbf{h}_0^{-1} - \mathbf{I}), \quad (6)$$

where  $\mathbf{I}$  is the unit matrix of the dimensionality 3. Both  $\mathbf{h}$  and  $\mathbf{h}_0$  are kept symmetric during simulations. Considering that at equilibrium  $\varepsilon_{ij} = 0$ , it has been shown [5] that fluctuations of  $\varepsilon_{ij}$  are related to the elastic compliance tensor  $S_{ijkl}$ :

$$S_{ijkl} = \langle \Delta\varepsilon_{ij} \Delta\varepsilon_{kl} \rangle \frac{V_p}{k_B T}, \quad (7)$$

where  $\Delta\varepsilon_{ij}$  is the difference between reference and instantaneous states, and the  $\langle \dots \rangle$  denotes the averaging in the isothermal–isobaric ensemble:

$$\langle f \rangle = \frac{\int d\varepsilon^{(6)} f \exp(-G/k_B T)}{\int d\varepsilon^{(6)} \exp(-G/k_B T)} \quad (8)$$

(for more details see [3,7,8]).

## 3. $\vec{n}$ and $\vec{m}$ directions

Based on the knowledge of the full tensor of elastic compliances one can calculate the Poisson's ratio for arbitrary direction [9]

$$\nu_{nm} = - \frac{m_i m_j S_{ijkl} n_k n_l}{n_p n_r S_{prst} n_s n_t}, \quad (9)$$

In the equation (9)  $\vec{n}$  and  $\vec{m}$  are unit vectors indicating selected pair of directions (illustrated in the Figure 1) for which the Poisson's ratio is calculated. The  $\vec{n} = (n_x, n_y, n_z)$  vector is oriented in the direction of the applied stress (according to the definition of the Poisson's ratio). The  $\vec{m}$  represents the direction in which the reaction of the system on the applied stress is observed. It is located on the plane orthogonal to  $\vec{n}$ , spanned by vectors  $\vec{m}_1$  and  $\vec{m}_2$ :

$$\vec{m}_1 = \frac{\hat{k} \times \hat{n}}{\sqrt{(\hat{k} \times \hat{n}) \cdot (\hat{k} \times \hat{n})}} = \frac{1}{\sqrt{n_x^2 + n_y^2}} (-n_y, n_x, 0), \quad (10)$$

$$\vec{m}_2 = \hat{n} \times \vec{m}_1 = \frac{1}{\sqrt{n_x^2 + n_y^2}} (-n_x n_z, -n_y n_z, n_x^2 + n_y^2), \quad (11)$$

where  $\hat{k}$  is the versor of the Oz axis. The versor is the unit vector denoted by symbol  $\hat{\cdot}$ . The  $\alpha$  angle describes the orientation of  $\vec{m}$  vector on that plane:

$$\vec{m} = \vec{m}_1 \cos \alpha + \vec{m}_2 \sin \alpha. \quad (12)$$

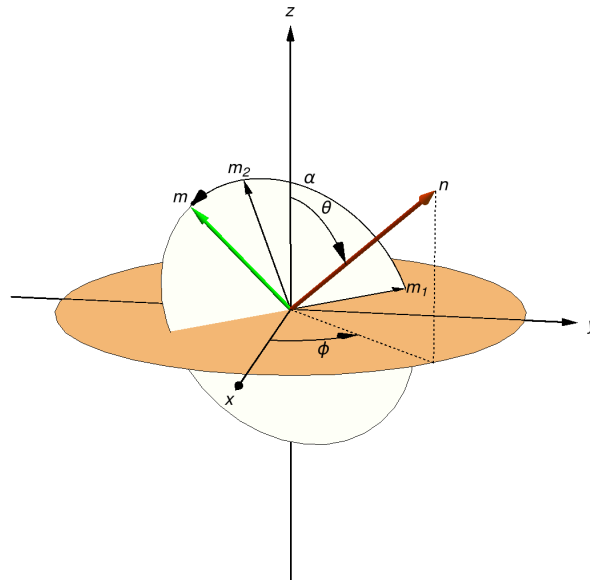

**Figure 1.** Spherical coordinates:  $\vec{n}$  (described by polar and azimuthal angles  $\theta, \phi$ ) and  $\vec{m}$  (described by  $\alpha$  angle).  $\alpha$  is the angle between  $\vec{m}$  and  $\vec{m}_1$  ( $\vec{m}_1$  is the versor created by plane Oxy and plane orthogonal to  $\vec{n}$ ).

## References

1. L. D. Landau and E. M. Lifshitz. *Theory of Elasticity*. Pergamon Press, London, 1986.
2. K. W. Wojciechowski. Negative Poisson ratios at negative pressures. *Molecular Physics Reports*, 10: pp. 129–136, 1995.
3. K. W. Wojciechowski, K. V. Tretiakov, and M. Kowalik. Elastic properties of dense solid phases of hard cyclic pentamers and heptamers in two dimensions. *Phys. Rev. E*, 67: 036121, 2003.
4. J. H. Weiner. *Statistical Mechanics of Elasticity*. Wiley, New York, 1983.
5. M. Parrinello and A. Rahman. Polymorphic transitions in single crystals: A new molecular dynamics method. *J. Appl. Phys.*, 52: pp. 7182–7190, 1981.
6. M. Parrinello and A. Rahman. Strain fluctuations and elastic constants. *J. Chem. Phys.*, 76: pp. 2662–2666, 1982.
7. K. W. Wojciechowski, K. V. Tretiakov, A. C. Brańka, and M. Kowalik. Elastic properties of two-dimensional hard disks in the close-packing limit. *J. Chem. Phys.*, 119: 939, 2003.

8. K. W. Wojciechowski. Computer simulations of elastic constants without calculating derivatives of the interaction potential. *Comp. Meth. Sci. Technol.*, 8(2): pp. 77–83, 2003.
9. S. P. Tokmakova. Stereographic projections of Poisson's ratio in auxetic crystals. *Phys. Status Solidi B-Basic Solid State Phys.*, 242(3): pp. 721–729, 2005.

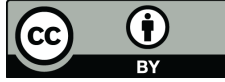

© 2018 by the authors. Licensee MDPI, Basel, Switzerland. This article is an open access article distributed under the terms and conditions of the Creative Commons Attribution (CC BY) license (<http://creativecommons.org/licenses/by/4.0/>).
